# Supplementary material for: Predictive single nucleotide polymorphism markers for acute oral mucositis in patients with nasopharyngeal carcinoma treated with radiotherapy
Source: PubMed Central journal article supplement (PMC5609900; doi:10.18632/oncotarget.18450), 2017-06-13
Supplement: oncotarget-08-63026-s001.pdf [file oncotarget-08-63026-s001.pdf]

## Predictive single nucleotide polymorphism markers for acute oral mucositis in patients with nasopharyngeal carcinoma treated with radiotherapy

### SUPPLEMENTARY MATERIALS

Supplementary Table 1: Clinical features of patients in genotyping study and mRNA expression study

| Clinical feature | genotype group | mRNA expression group | <i>p</i> value |
|------------------|----------------|-----------------------|----------------|
| Gender           |                |                       | 0.60           |
| Male             | 19             | 4                     |                |
| Female           | 5              | 2                     |                |
| Age, mean±SD, y  | 49.04± 14.21   | 43.67± 8.02           | 0.38           |
| Clinical stage   |                |                       | 1.00           |
| I-II             | 6              | 1                     |                |
| III-IV           | 18             | 5                     |                |
| Treatment        |                |                       | 1.00           |
| RT alone         | 5              | 1                     |                |
| RT +CT           | 19             | 5                     |                |

**Supplementary Table 2: Detailed Information of 379 SNPs associated with severe oral mucositis**

See Supplementary File 1
